# Supplementary material
Source: PubMed Central journal article supplement (PMC2973004)
Supplement: 1008362107_pnas.201008362SI.pdf [file 1008362107_pnas.201008362SI.pdf]

# Supporting Information

Allan et al. 10.1073/pnas.1008362107

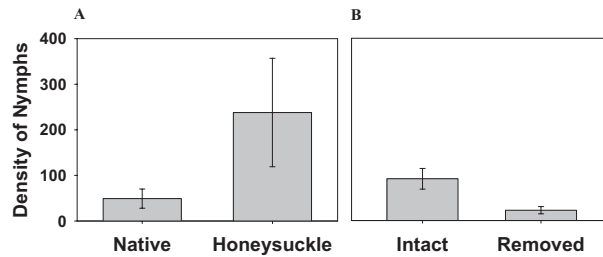

Fig. S1. Density of *A. americanum* nymphs in native vegetation vs. honeysuckle plots (A) and in honeysuckle-intact vs. -eradicated plots (B). Error bars reflect 1 SE.

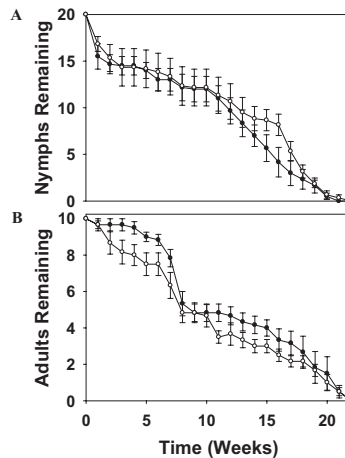

Fig. S2. Survival of *A. americanum* nymphs (A) and adults (B) in honeysuckle-intact vs. -eradicated plots. Open circles indicate honeysuckle vegetation intact; closed circles indicate honeysuckle vegetation eradicated. Error bars reflect 1 SE.

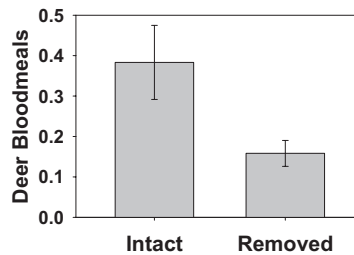

Fig. S3. Proportion of blood meals derived from white-tailed deer detected in *A. americanum* nymphs collected from honeysuckle-intact vs. -eradicated plots. Error bars reflect 1 SE.

**Table S1. Effects of fruit removal and the interaction between fruit removal and vegetation removal on the response variables measured in the honeysuckle eradication experiment**

| Response variable                                 | Treatment                                      | F value            | P value            |
|---------------------------------------------------|------------------------------------------------|--------------------|--------------------|
| Nymph abundance                                   | Fruit removal                                  | 0.73               | 0.454              |
|                                                   | Fruit removal × vegetation removal interaction | 1.58               | 0.263              |
| Adult abundance                                   | Fruit removal                                  | 1.80               | 0.23               |
|                                                   | Fruit removal × vegetation removal interaction | 1.09               | 0.368              |
| Prevalence of <i>E. ewingii</i>                   | Fruit removal                                  | 4.32               | 0.073              |
|                                                   | Fruit removal × vegetation removal interaction | 0.04               | 0.858              |
| Density of nymphs Infected with <i>E. ewingii</i> | Fruit removal                                  | 0.01               | 0.918              |
|                                                   | Fruit removal × vegetation removal interaction | 0.10               | 0.817              |
| Deer dung cluster density                         | Fruit removal                                  | 2.82               | 0.149              |
|                                                   | Fruit removal × vegetation removal interaction | *                  | *                  |
| Proportion of blood meals from deer               | Fruit removal                                  | 0.43               | 0.564              |
|                                                   | Fruit removal × vegetation removal interaction | 0.01               | 0.943              |
| Nymph survival                                    | Fruit removal                                  | z score            | P value            |
|                                                   | Fruit removal × vegetation removal interaction | −3.64 <sup>†</sup> | 0.001 <sup>†</sup> |
| Adult survival                                    | Fruit removal                                  | −1.69              | 0.09               |
|                                                   | Fruit removal × vegetation removal interaction | <sup>†</sup>       | <sup>†</sup>       |

\*Insufficient sample size to detect the interaction term via permutational ANOVA.

<sup>†</sup>Highly nonsignificant interaction terms were excluded from the final Cox proportional hazards model.
